# Supplementary material for: Valorization of Pennisetum setaceum: From Invasive Plant to Fiber Reinforcement of Injected Composites
Source: MDPI journal article supplement (doi:10.3390/plants12091777), 2023-04-26
Supplement: s1 [file s1]

## Supplementary Materials

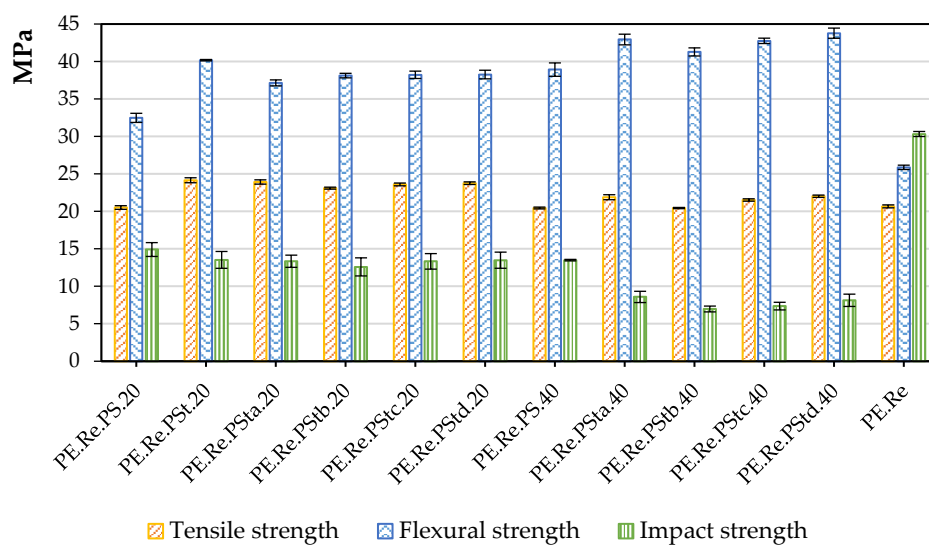

**Figure S1.** Tensile, flexural and impact strength of the composites and unreinforced recycled high-density polyethylene.

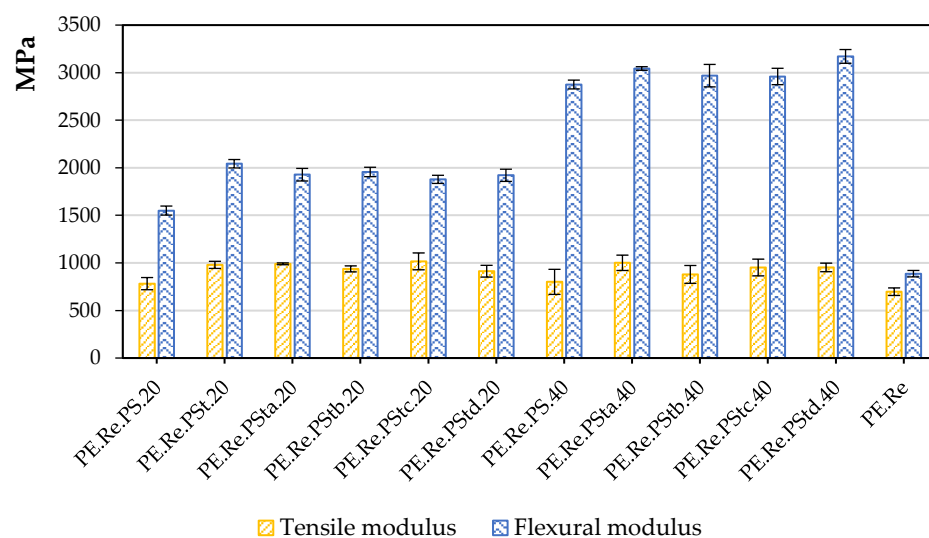

**Figure S2.** Modulus of elasticity (tensile and flexural) of the composites and unreinforced recycled high-density polyethylene.
